# Supplementary material for: Levelling the playing field: screening for synergistic effects in coalesced bimetallic nanoparticles
Source: Royal Society of Chemistry journal article supplement (doi:10.1039/c5nr07763j), 2016-01-01
Supplement: c5nr07763j1.pdf [file c5nr07763j1.pdf]

## Supporting Information

### Leveling the Playing Ground: Screening for Synergistic Effects in Coalesced Bimetallic Nanoparticles

Rachel Lee Siew Tan,<sup>a,b</sup> Xiaohui Song,<sup>a</sup> Bo Chen,<sup>c</sup> Wen Han Chong,<sup>a</sup> Yin Fang,<sup>a</sup> Hua Zhang,<sup>c</sup>

Jun Wei,<sup>\*,b</sup> and Hongyu Chen<sup>\*,a</sup>

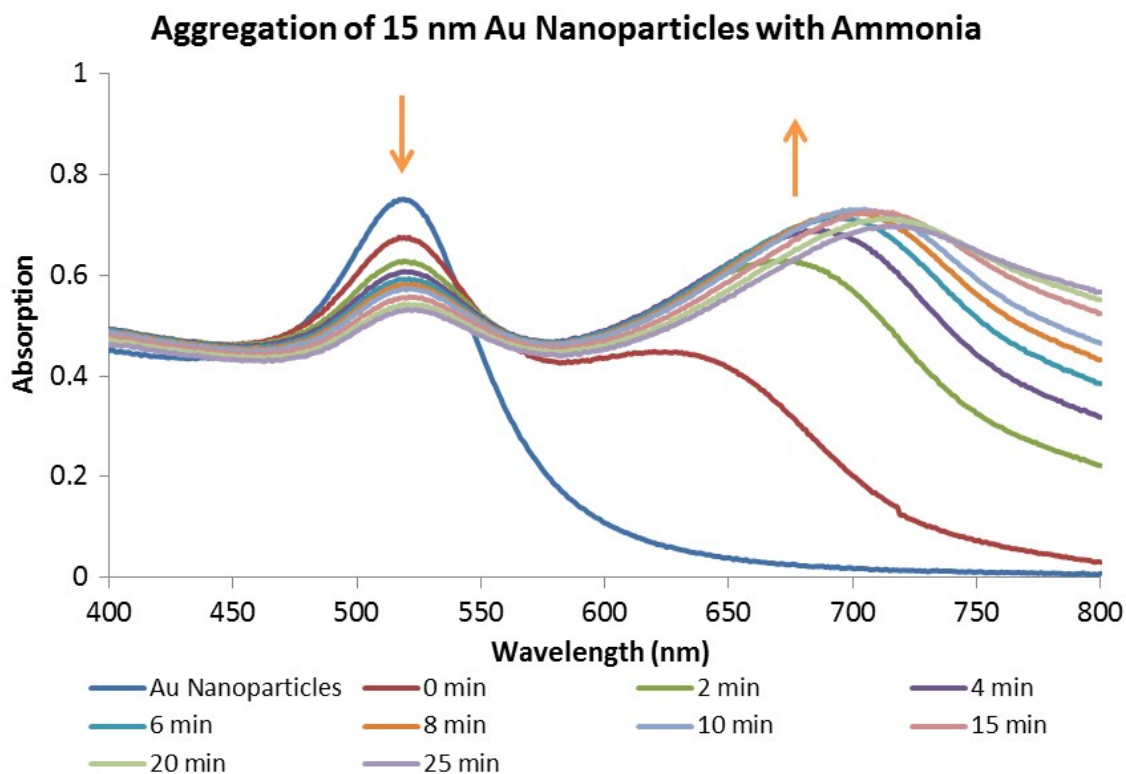

**Figure S1.** Kinetics UV-vis spectra showing the change in absorption of 15 nm Au nanoparticles caused by the addition of ammonia (final concentration: 360 mM). The decrease in absorption of 520 nm peak and the increase in absorption and redshift of the 650-700 nm peaks were caused by the aggregation of Au nanoparticles.

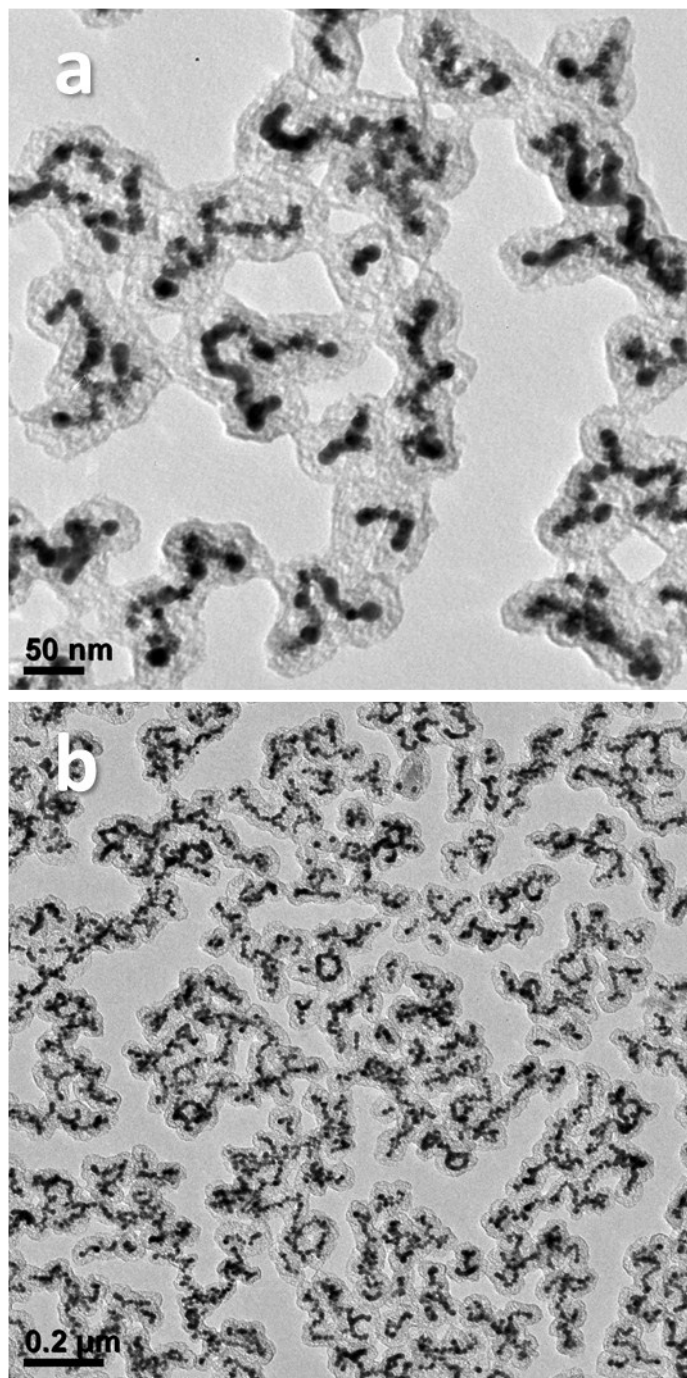

**Figure S2.** TEM images of Au-Pt bimetallic samples prepared with 15-20 nm nanoparticles: (a) zoom in, and (b) zoom out.

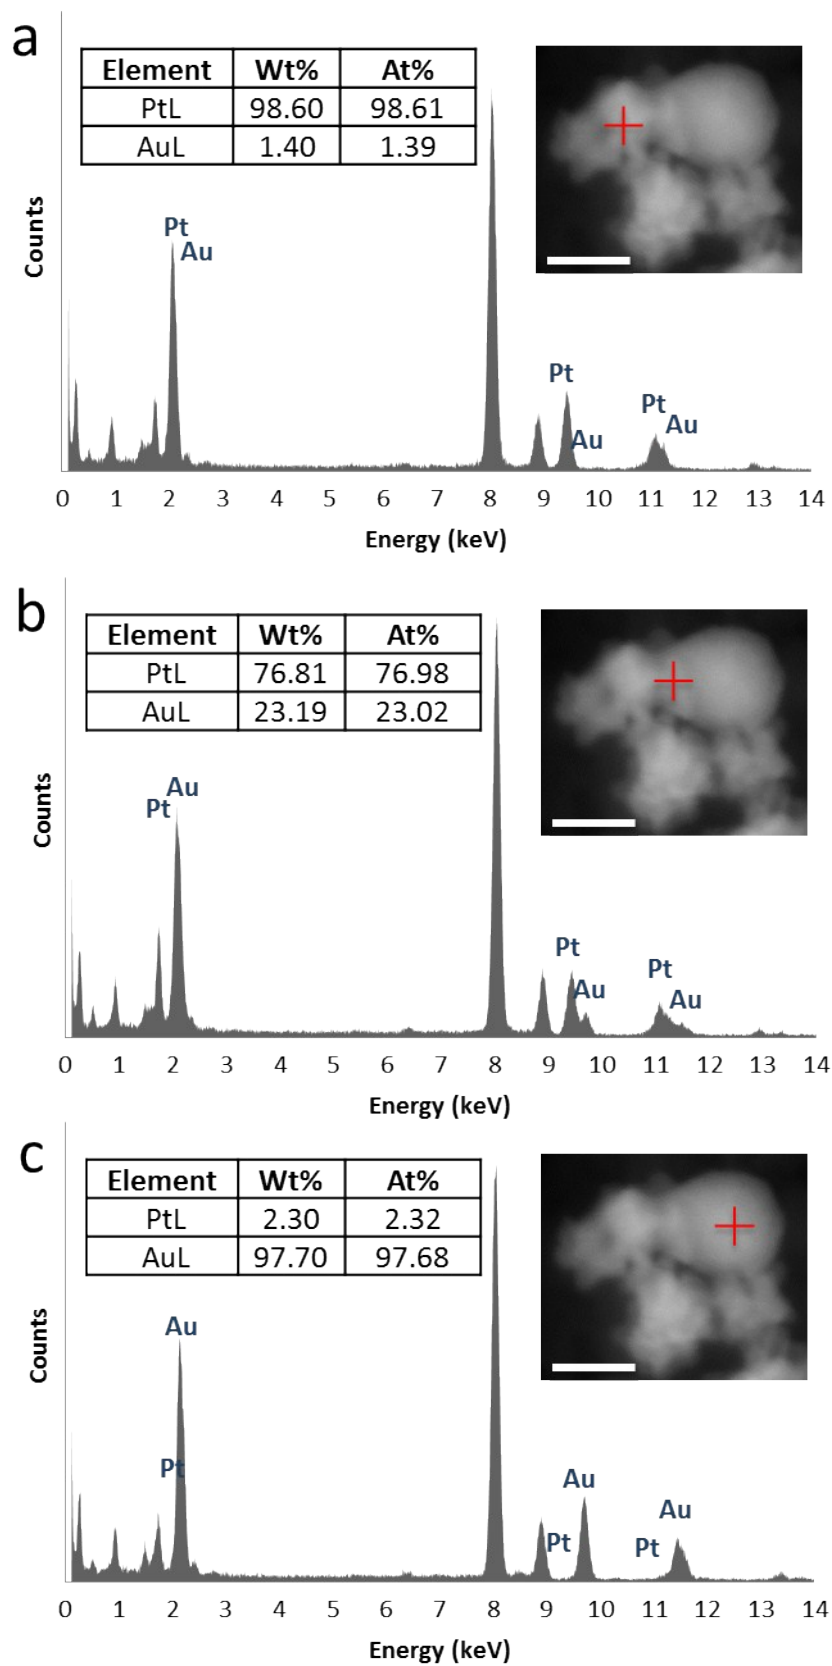

**Figure S3.** EDS point scans of 3 different regions showing metal composition: (a) Pt; (b) Au-Pt; and (c) Au. Insert scale bars are 10 nm.

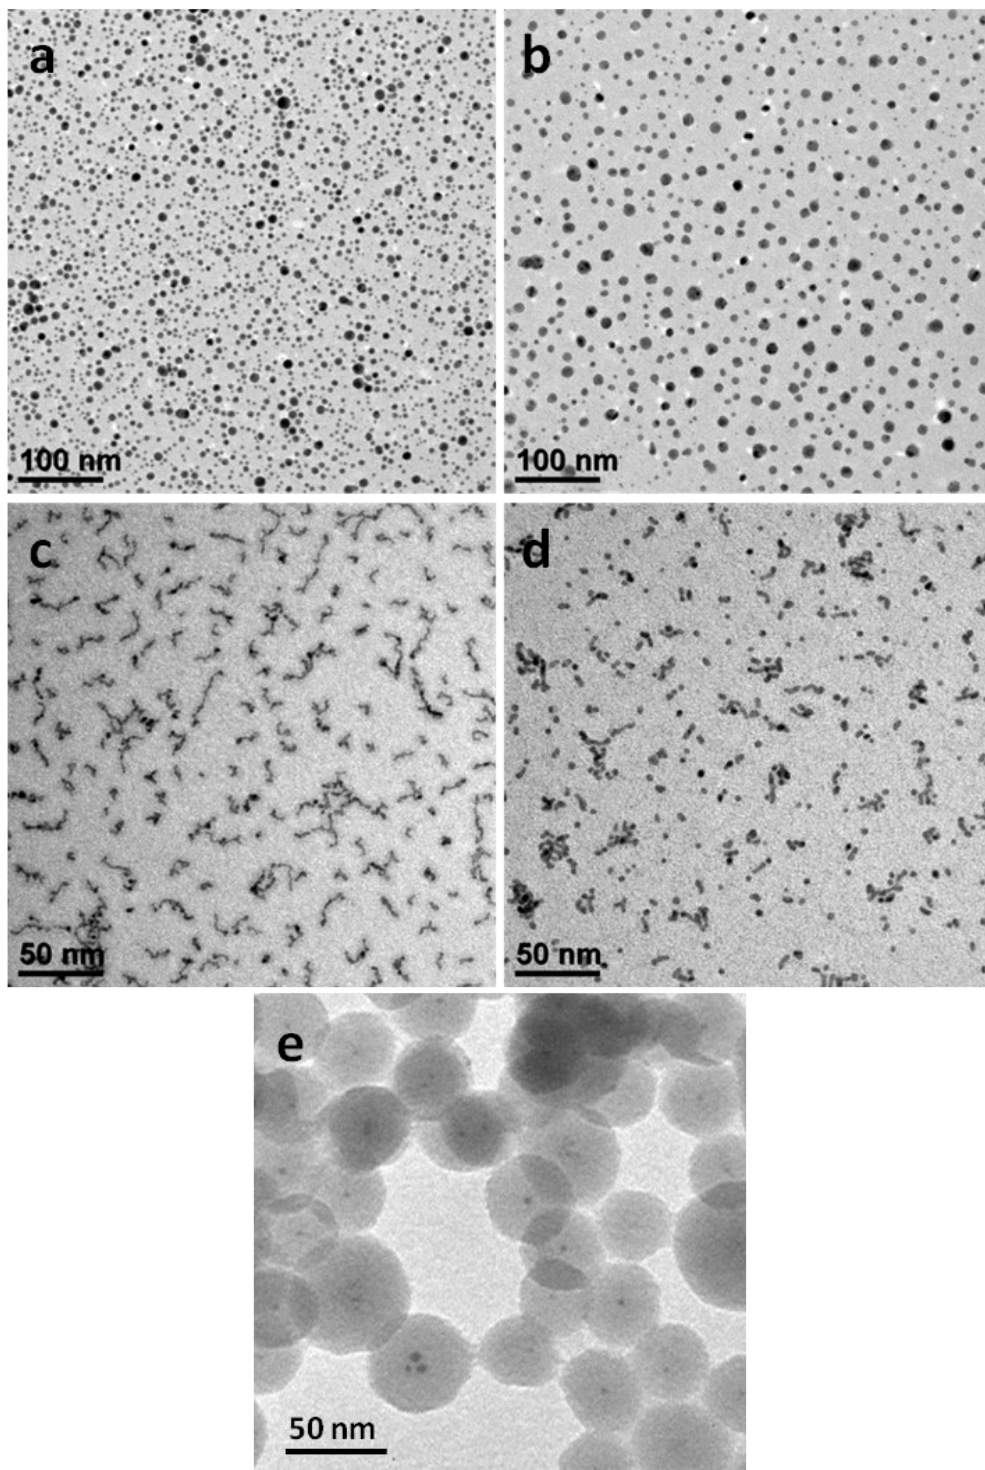

**Figure S4.** TEM images of nanoparticle stock solution of 5 nm small nanoparticles: (a) Au, (b) Ag, (c) Pt, (d) Pd, and (e) To investigate the aggregation state of the 5 nm Pt nanoparticles, they were coated by silica shells using the reverse emulsion method, giving core-shell nanostructures. The results showed that most of the nanoparticles were not aggregated, suggesting that the slight aggregation observed in c was due to the drying process during TEM sample preparation.

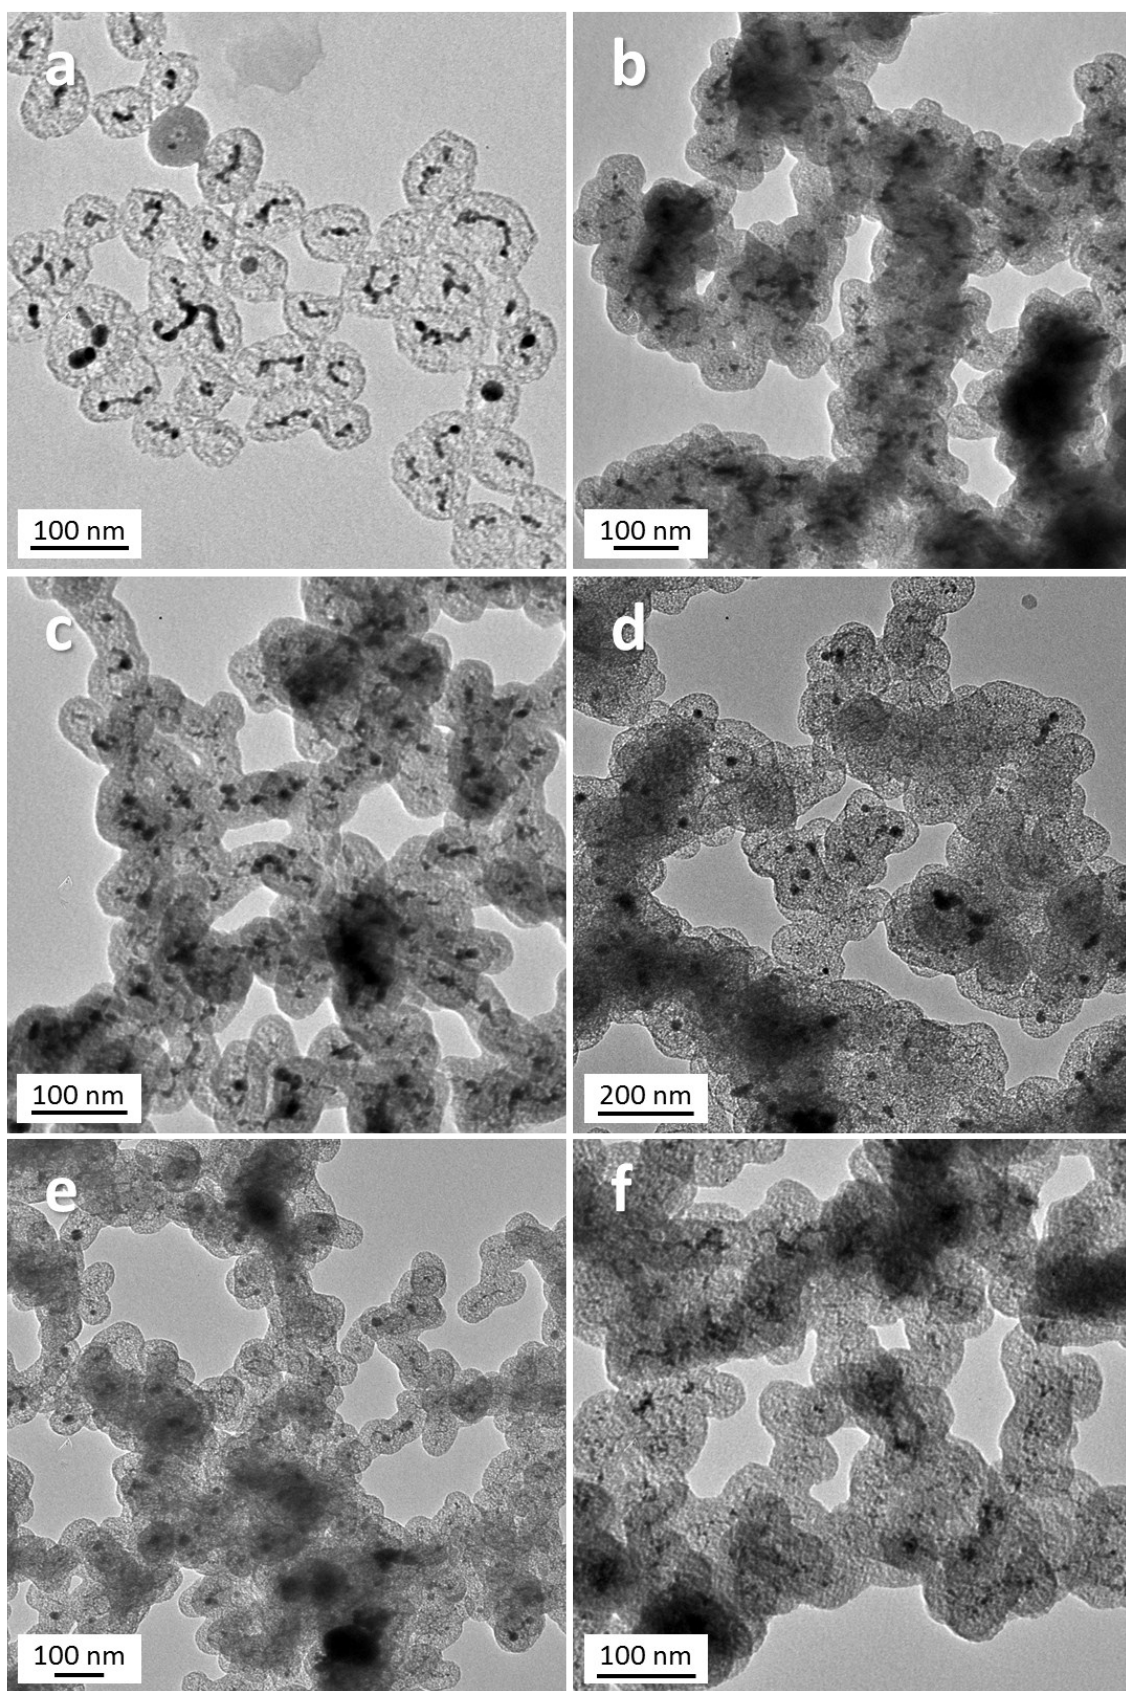

**Figure S5.** TEM images of bimetallic samples formed with different combinations: (a) Au-Ag; (b) Au-Pd, (c) Au-Pt, (d) Ag-Pd, (e) Ag-Pt, and (f) Pt-Pd.

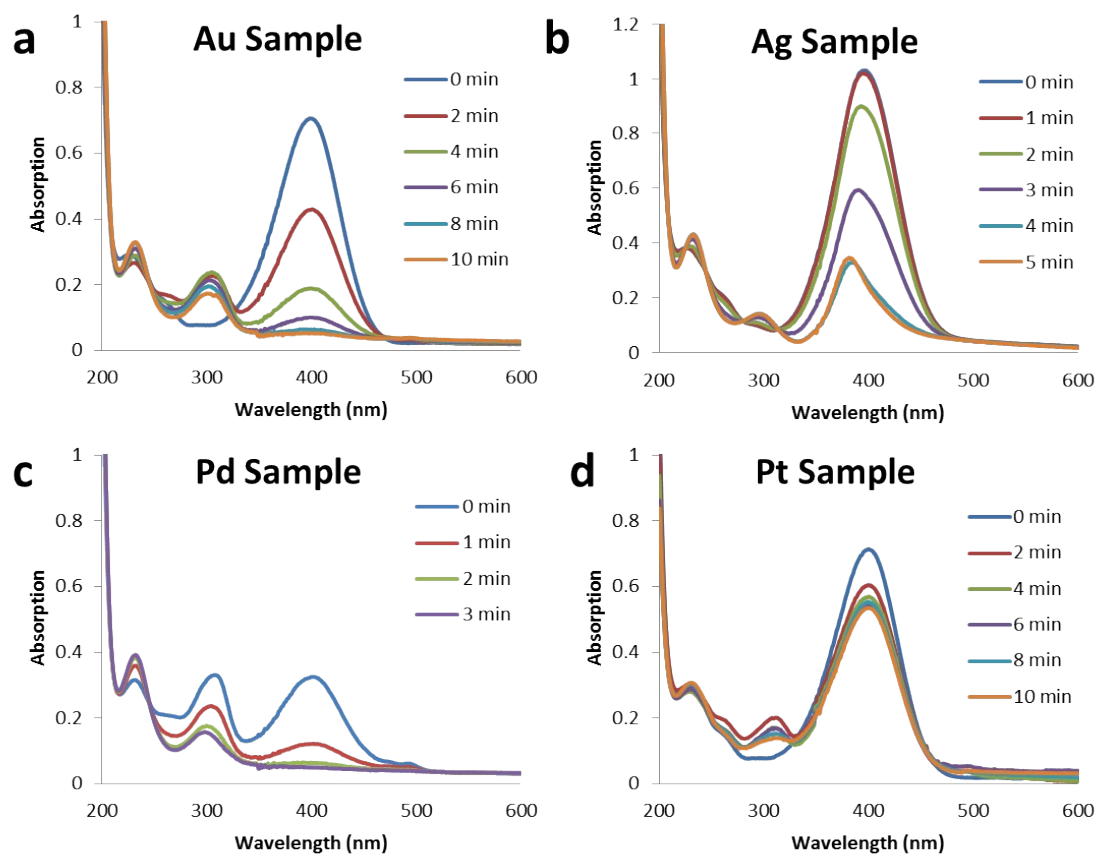

**Figure S6.** Kinetic UV-Vis spectra of reduction of 4-nitrophenol using mono-metallic samples: (a) Au, (b) Ag, (c) Pd, and (d) Pt.

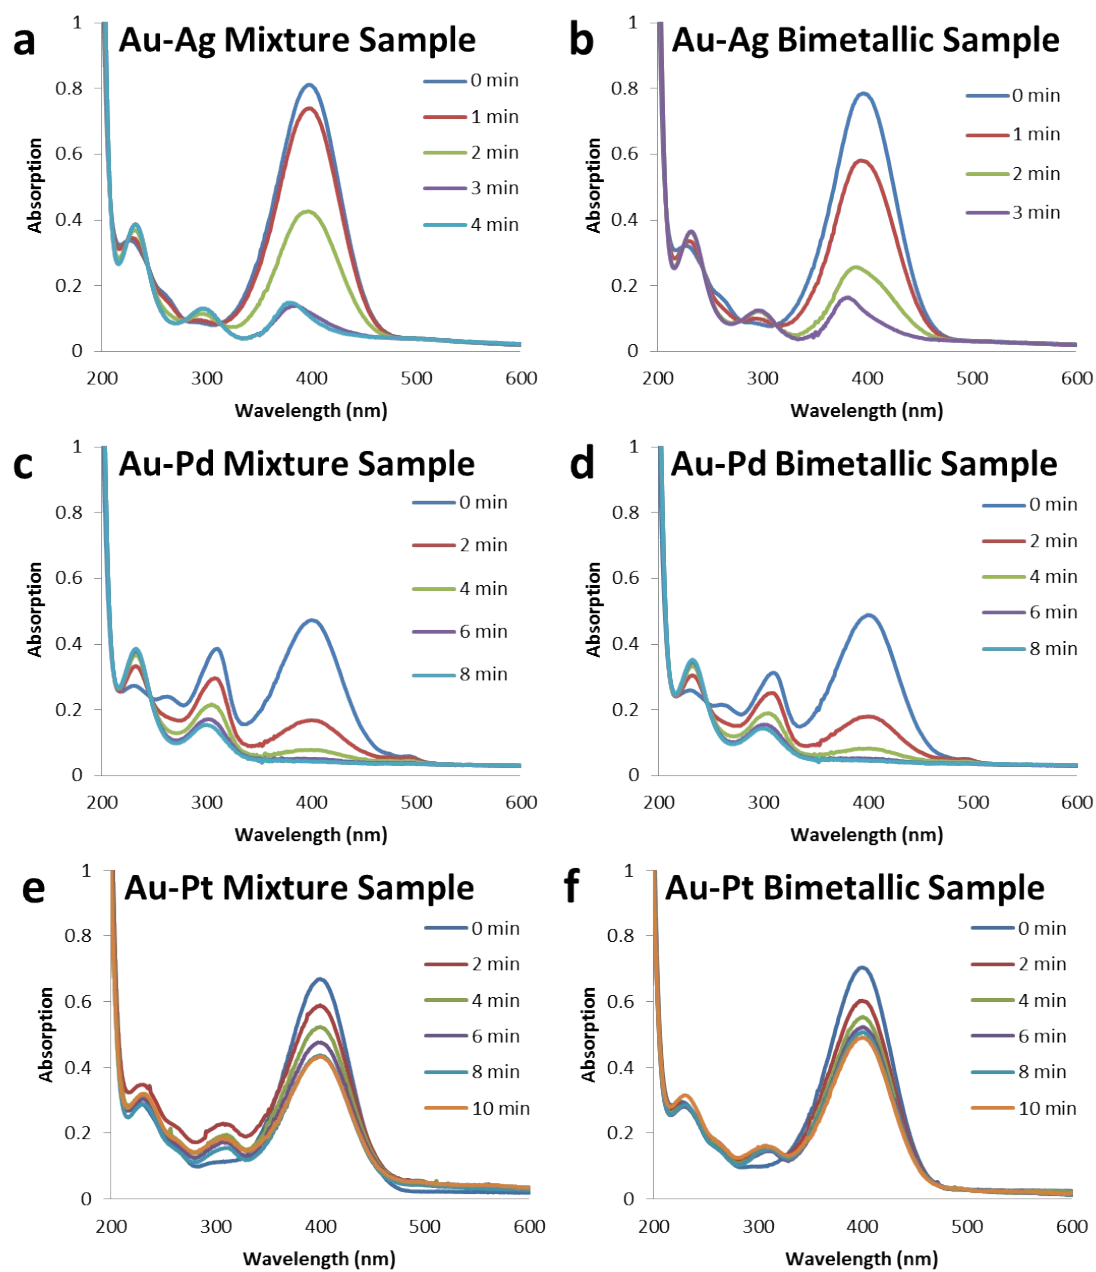

**Figure S7.** Kinetic UV-Vis spectra of reduction of 4-nitrophenol using mixture and bimetallic samples: (a, b) Au-Ag, (c, d) Au-Pd, and (e, f) Au-Pt.

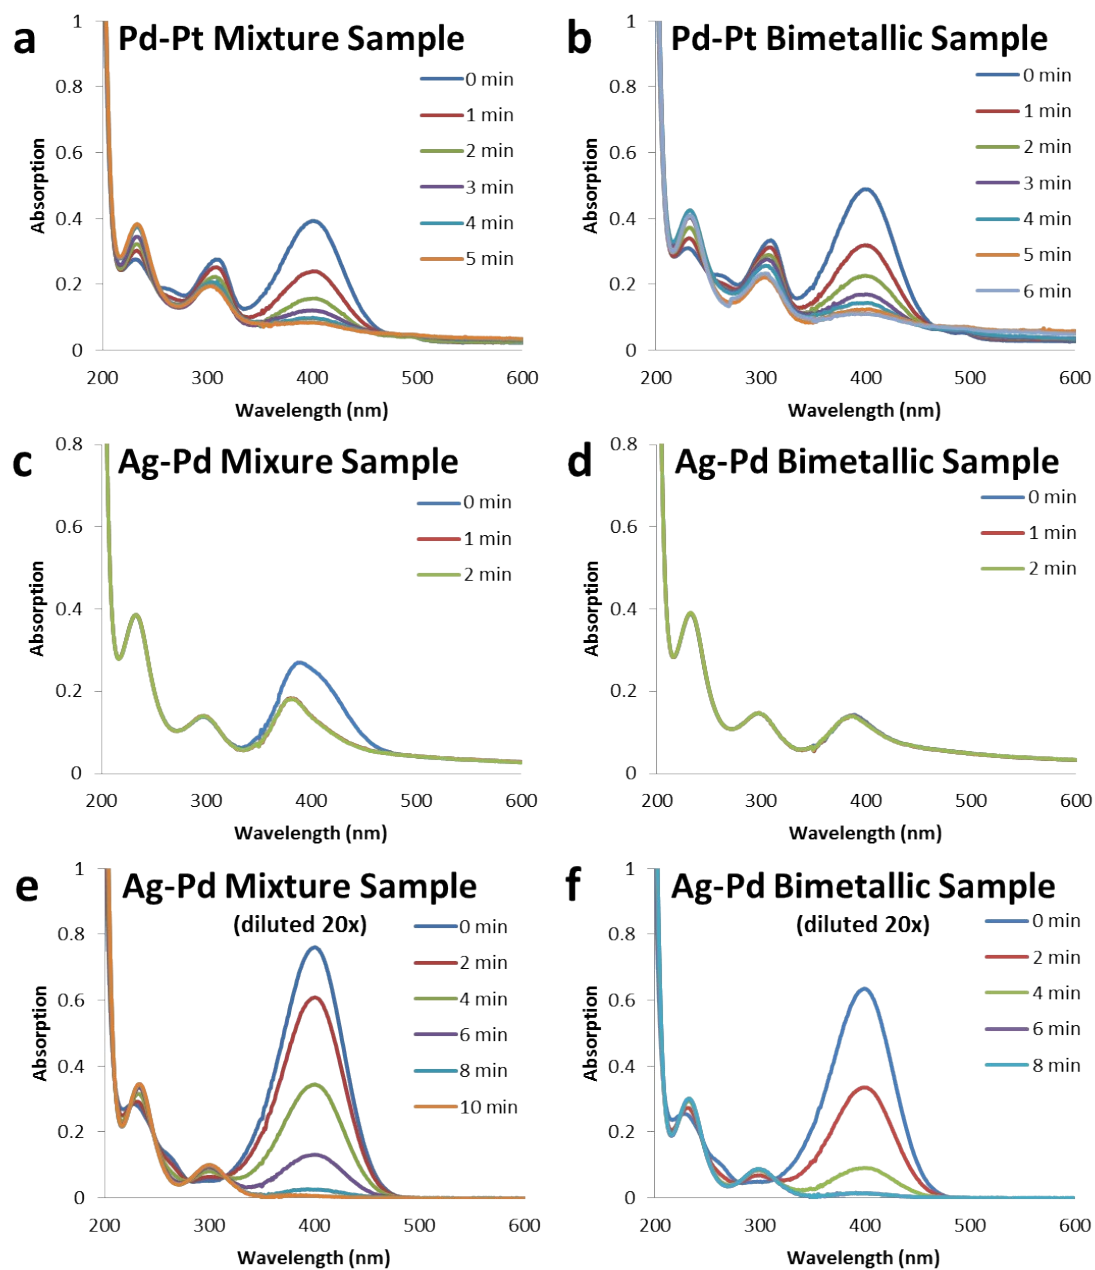

**Figure S8.** Kinetic UV-Vis spectra of reduction of 4-nitrophenol using mixture and bimetallic samples: (a, b) Pd-Pt, (c, d) Ag-Pd, and (e, f) Ag-Pd (diluted 20 times).



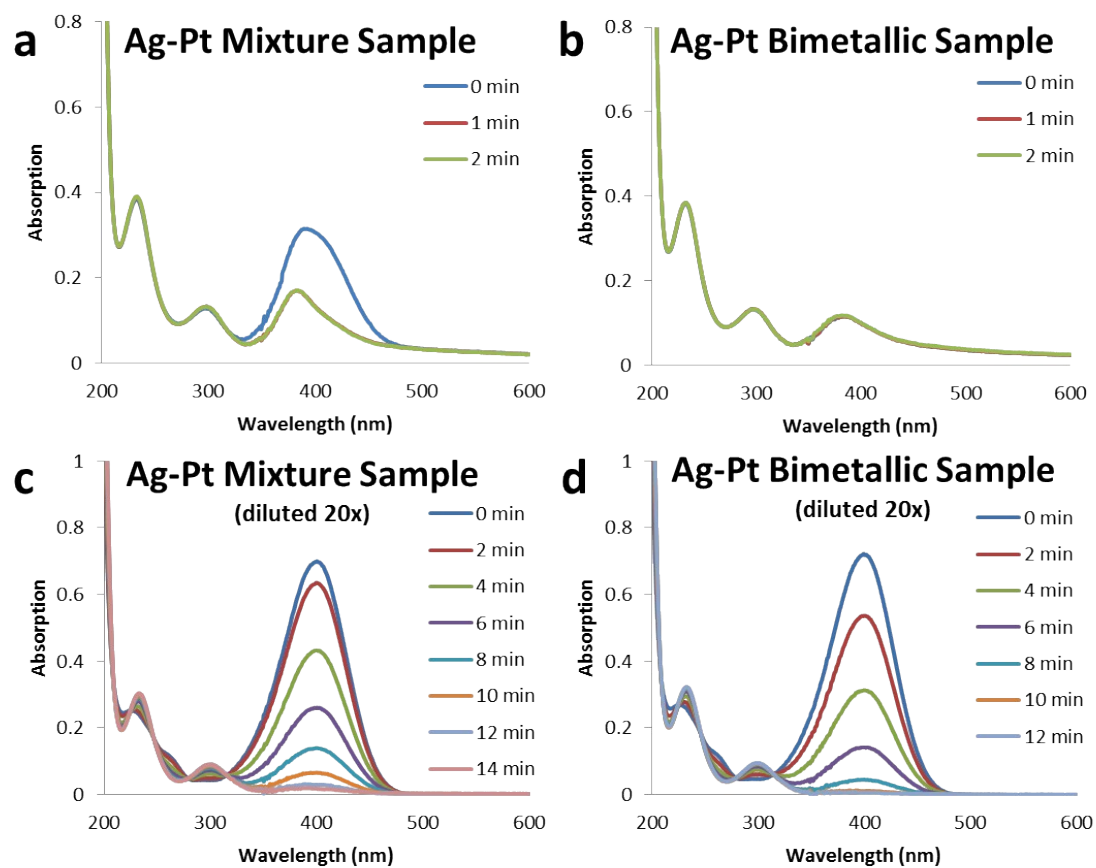

**Figure S9.** Kinetic UV-Vis spectra of reduction of 4-nitrophenol using mixture and bimetallic samples: (a, b) Ag-Pt, and (c, d) Ag-Pt (diluted 20 times).

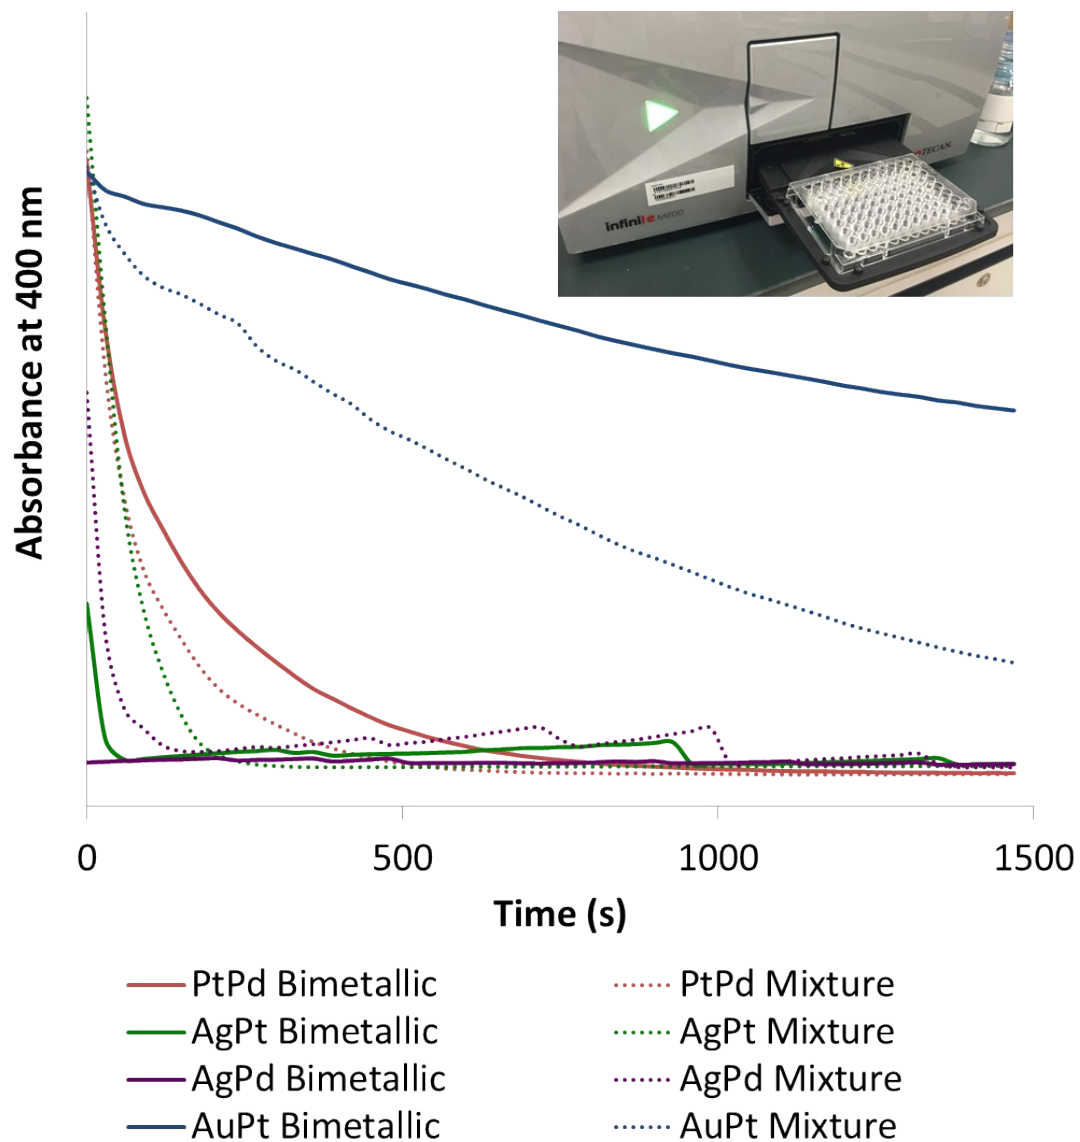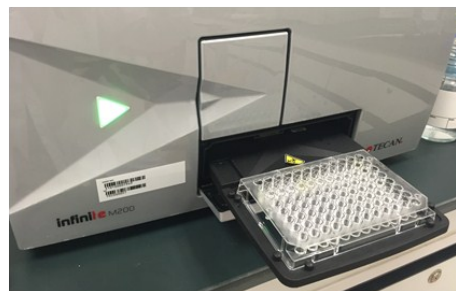

**Figure S10.** UV-Vis absorption trace at 400 nm for 4 combinations of samples during catalysis (insert: the 96-well microwell plate used in multi-plate reader).

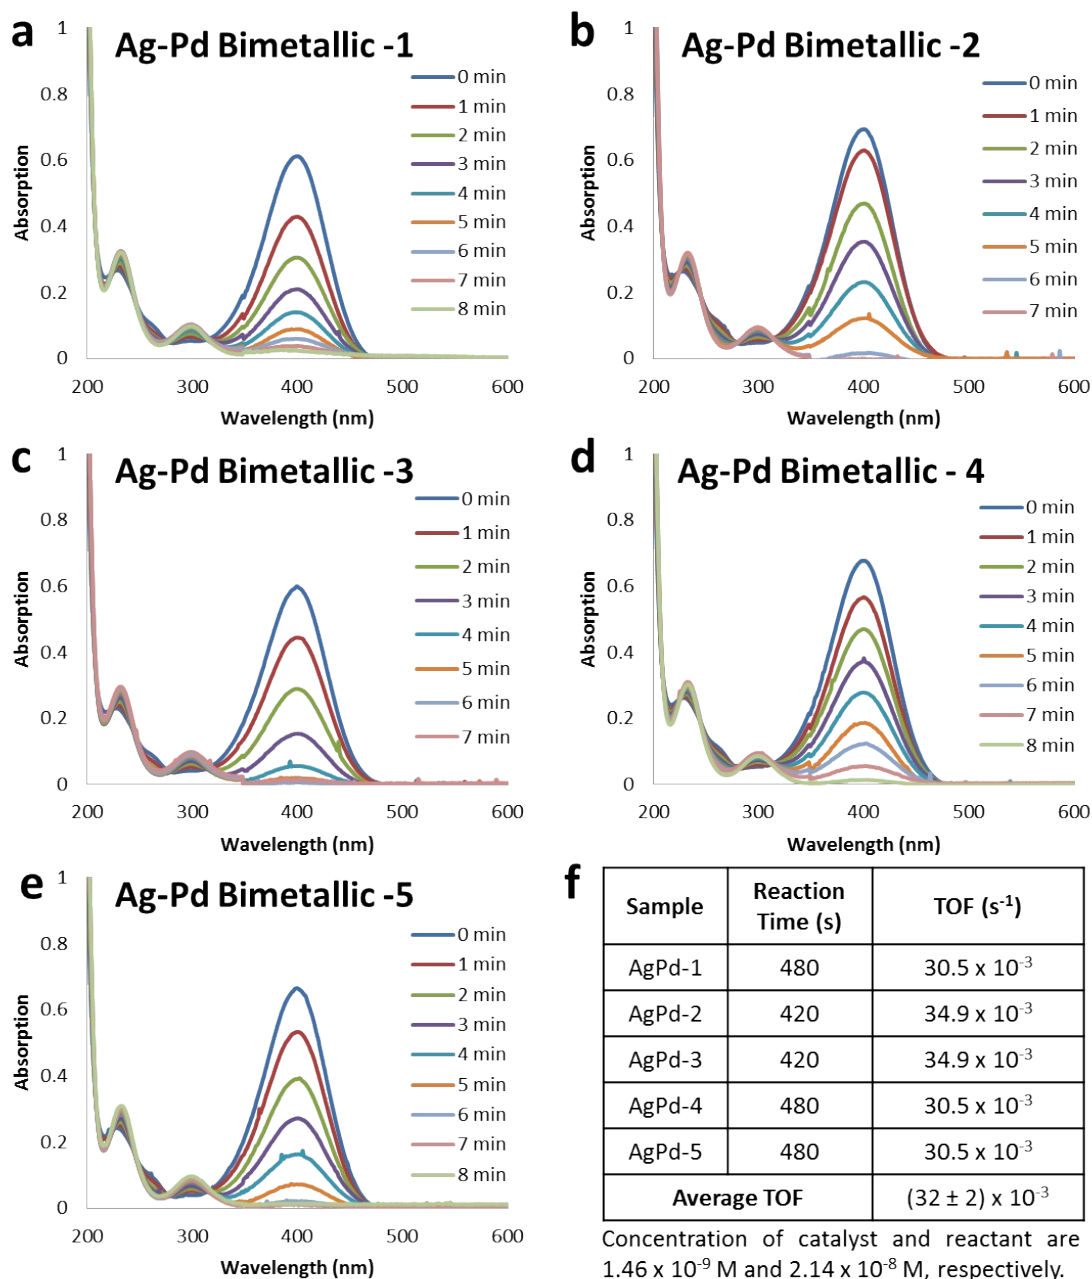

**Figure S11.** (a-e) Kinetic UV-Vis spectra recorded during the catalytic reduction of 4-nitrophenol with 5 different batches of Ag-Pd bimetallic samples. (f) Tabulation of turnover frequency for the 5 samples in a-e.

## Calculations

### Enhancement Factor

**Total number of moles of metal atoms during nanoparticle synthesis**

*number of moles of metal atoms*

$$= \text{number of moles of metal salt} = 250 \mu\text{L} \times 50 \text{ mM} = 1.25 \times 10^{-5} \text{ mol}$$

**Number of moles of metal atoms in a typical silica encapsulation (1 mL of each type of nanoparticle used; total metal nanoparticle synthesis volume = 52.2 mL)**

*number of moles of metal atoms used during silica encapsulation*

$$= 1.25 \times 10^{-5} \text{ mol} \div 52.2 \text{ mL} \times 2 \text{ mL} = 4.79 \times 10^{-7} \text{ mol}$$

**Etching silica encapsulated nanoparticles to form yolk-shell structures (1mL of silica encapsulation solution used, then concentrated to 100  $\mu\text{L}$ )**

*number of moles of metal atoms after yolkshell structure formation*

$$= 4.79 \times 10^{-7} \text{ mol} \div 1.642 \text{ mL} = 2.92 \times 10^{-7} \text{ mol in } 100 \mu\text{L solution}$$

**Number of moles of each type of metal atoms used in each catalytic reaction (10  $\mu\text{L}$  of concentrated solution)**

*number of moles of metal atoms used for each catalytic reaction*

$$= 2.92 \times 10^{-7} \times \frac{10}{100} = 2.92 \times 10^{-8} \text{ mol}$$

**Number of moles of 4-nitrophenol in each catalytic reaction**

$$\text{number of moles of 4-nitrophenol} = 15 \text{ mM} \times 100 \mu\text{L} \times \frac{10}{700} = 2.14 \times 10^{-8} \text{ mol}$$

Turnover Frequency (TOF) = number of mole of product/(number of mole of catalyst × time)

| Monometallic Catalyst |                         | Mole of Reactant        | Mole of Catalyst               | Reaction Time                     | TOF (s <sup>-1</sup> )  |
|-----------------------|-------------------------|-------------------------|--------------------------------|-----------------------------------|-------------------------|
| Au                    |                         | 2.14 × 10 <sup>-8</sup> | 2.92 × 10 <sup>-8</sup>        | 600                               | 1.22 × 10 <sup>-3</sup> |
| Ag                    |                         | 2.14 × 10 <sup>-8</sup> | 2.92 × 10 <sup>-8</sup>        | 300                               | 2.44 × 10 <sup>-3</sup> |
| Pt                    |                         | 2.14 × 10 <sup>-8</sup> | 2.92 × 10 <sup>-8</sup>        | -                                 | -                       |
| Pd                    |                         | 2.14 × 10 <sup>-8</sup> | 2.92 × 10 <sup>-8</sup>        | 180                               | 5.94 × 10 <sup>-3</sup> |
| Metal Combination     | Mole of Reactant        | Mole of Catalyst        | TOF Mixture (s <sup>-1</sup> ) | TOF Bimetallic (s <sup>-1</sup> ) | Enhancement Factor (EF) |
| AuAg                  | 2.14 × 10 <sup>-8</sup> | 2.92 × 10 <sup>-8</sup> | 3.05 × 10 <sup>-3</sup>        | 4.07 × 10 <sup>-3</sup>           | 1.33                    |
| AuPd                  | 2.14 × 10 <sup>-8</sup> | 2.92 × 10 <sup>-8</sup> | 1.53 × 10 <sup>-3</sup>        | 1.53 × 10 <sup>-3</sup>           | 1                       |
| AuPt                  | 2.14 × 10 <sup>-8</sup> | 2.92 × 10 <sup>-8</sup> | -                              | -                                 | -                       |
| AgPd                  | 2.14 × 10 <sup>-8</sup> | 1.46 × 10 <sup>-9</sup> | 24.4 × 10 <sup>-3</sup>        | 30.5 × 10 <sup>-3</sup>           | 1.25                    |
| AgPt                  | 2.14 × 10 <sup>-8</sup> | 1.46 × 10 <sup>-9</sup> | 17.4 × 10 <sup>-3</sup>        | 20.4 × 10 <sup>-3</sup>           | 1.17                    |
| PdPt                  | 2.14 × 10 <sup>-8</sup> | 2.92 × 10 <sup>-8</sup> | 2.44 × 10 <sup>-3</sup>        | 2.04 × 10 <sup>-3</sup>           | 0.83                    |

### Surface Area Calculation

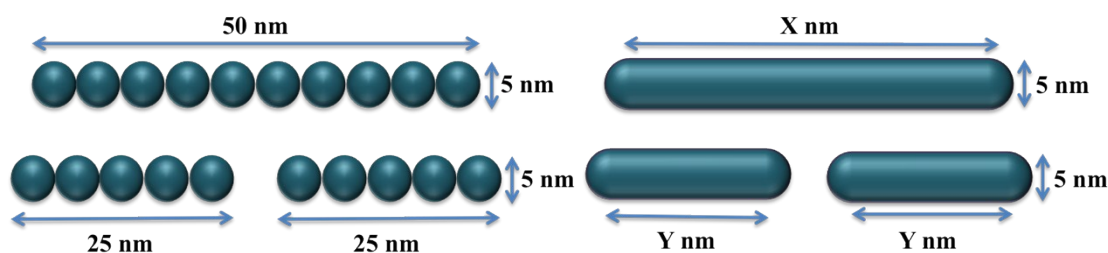

#### Total volume of nanoparticles (5 nm)

$$\text{volume of each nanoparticle} = \frac{4}{3}\pi r^3$$

$$\text{total volume of 10 nanoparticles} = 10 \times \frac{4}{3}\pi r^3$$

$$\text{total volume of 5 nanoparticles} = 5 \times \frac{4}{3}\pi r^3$$

#### Surface area of nanowire formed from the coalescence of 10 nanoparticles

$$\text{Volume of nanowire} = \frac{4}{3}\pi r^3 + \pi r^2 X$$

$$10 \times \frac{4}{3}\pi r^3 = \frac{4}{3}\pi r^3 + \pi r^2 X$$

$$10 \times \frac{4}{3}\pi r(2.5)^3 = \frac{4}{3}\pi(2.5)^3 + \pi(2.5)^2 X$$

$$X = 30 \text{ nm}$$

$$\text{Surface area} = 4\pi r^2 + 2\pi r X = 4\pi(2.5)^2 + 2\pi(2.5)(30) = 550 \text{ nm}^2$$

**Surface area of two nanowire formed from the coalescence of 5 nanoparticles each**

$$\text{Volume of nanowire} = \frac{4}{3}\pi r^3 + \pi r^2 Y$$

$$5 \times \frac{4}{3}\pi(2.5)^3 = \frac{4}{3}\pi(2.5)^3 + \pi(2.5)^2 Y$$

$$Y = 13.3 \text{ nm}$$

$$\text{Surface area} = 2[4\pi r^2 + 2\pi r Y] = 2[4\pi(2.5)^2 + 2\pi(2.5)(13.3)] = 575 \text{ nm}^2$$

**% Surface area difference between a nanowire formed by coalescence of 10 nanoparticles and two nanowires formed by coalescence of 5 nanoparticles each**

$$\% \text{ Difference} = \frac{575 - 550}{575} \times 100\% = 4.3\%$$

### **Number of nanoparticles in our encapsulation system**

$$\text{Mass of two metal} = 4.79 \times 10^{-7} \text{ mol} \times 196.96657 \text{ mol/g} = 9.4347 \times 10^{-5} \text{ g}$$

$$\text{Total volume of Au metal} = \text{mass} \div \text{density}$$

$$= (9.4347 \times 10^{-5} / 2) \div 19.3 \text{ g/cm}^3 = 2.4442 \times 10^{-6} \text{ cm}^3$$

$$\text{Volume of one 5 nm nanoparticle} = 4/3 \times \pi \times (2.5)^3 = 65.5 \text{ nm}^3$$

$$\text{Number of nanoparticles for Au metal} = 2.4442 \times 10^{-6} \div 65.5 \times 10^{-20} = 3.73 \times 10^{12} \text{ particles}$$
